# Supplementary material for: Glyoxal measurement with a proton transfer reaction time of flight mass spectrometer (PTR‐TOF‐MS): characterization and calibration
Source: PubMed Central journal article supplement (PMC6681138; doi:10.1002/jms.3893), 2016-11-25

Figure S1. Relationship between the m39/m21-ratio and the relative humidity in %.

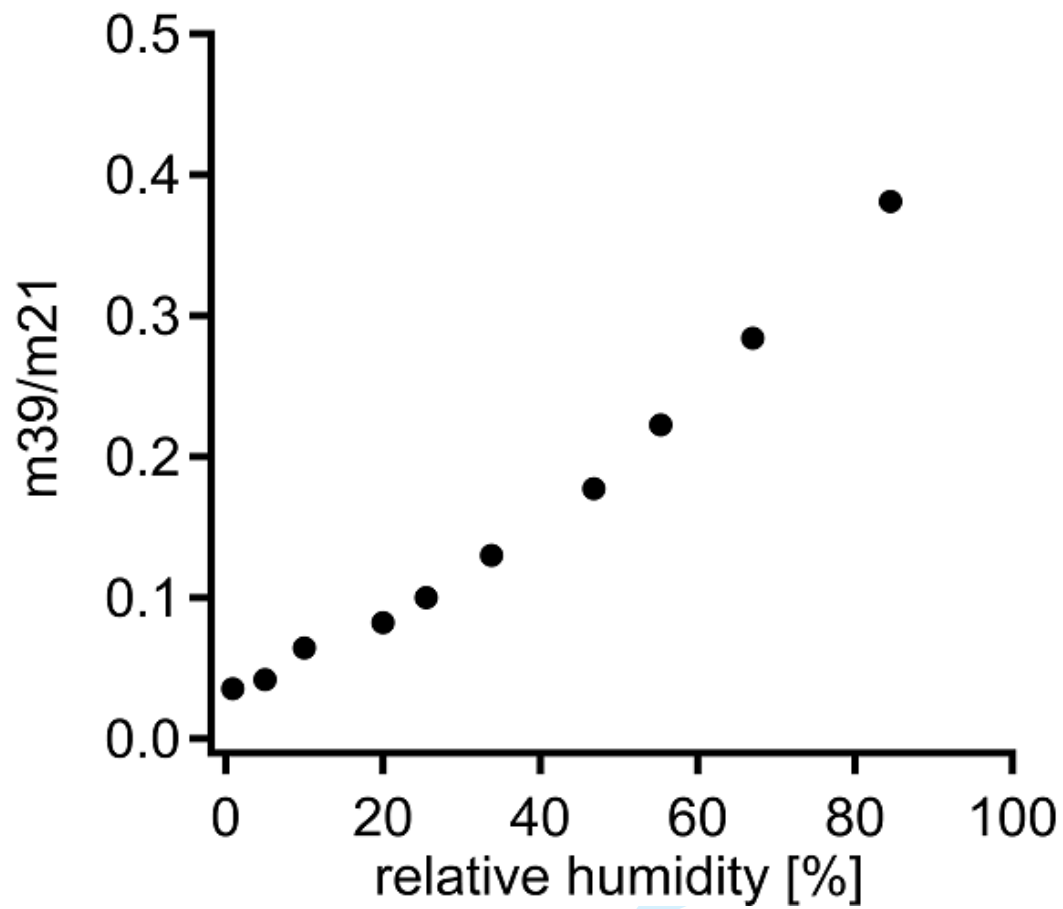

Figure S2 Optical density of glyoxal measured between 400 and 460 nm (red line), the reference spectrum (black line) and fit residuals (blue line).

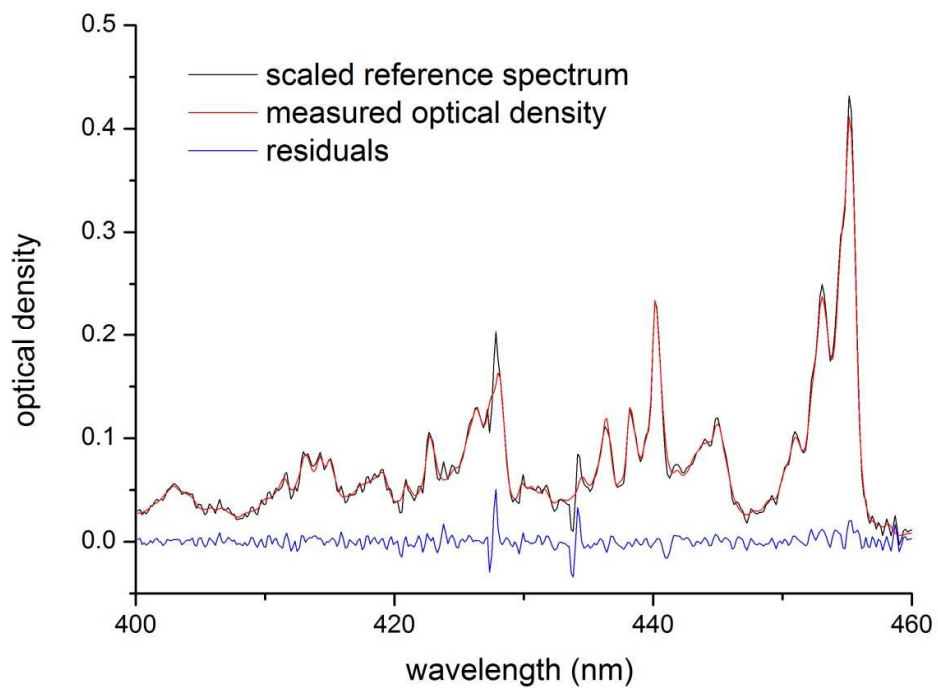

Supplement: JMS-52-30-s001.pdf [file JMS-52-30-s001.pdf]
